# Supplementary material for: In situ carbon coated LiFePO4/C microrods with improved lithium intercalation behavior
Source: Royal Society of Chemistry journal article supplement (doi:10.1039/c3cp53966k), 2013-11-11
Supplement: c3cp53966k.pdf [file c3cp53966k.pdf]

## SUPPORTING INFORMATION

### In-situ carbon coated LiFePO<sub>4</sub>/C micro rods with improved lithium intercalation behavior

*D. Bhuvaneshwari, N. Kalaiselvi\**

*ECPS Division, CSIR- Central Electrochemical Research Institute, Karaikudi-6, India*

6

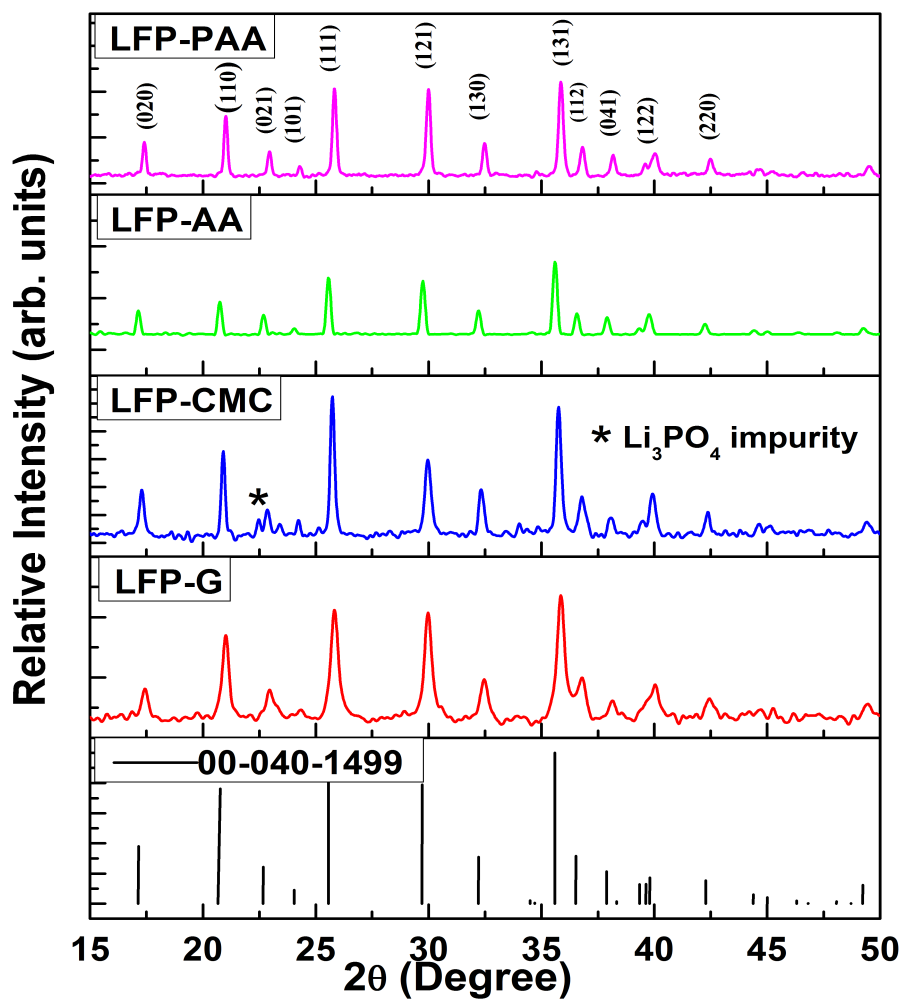

Figure S1 XRD pattern of hydrothermally synthesized LiFePO<sub>4</sub>/C samples at 200 °C using different carbon additives

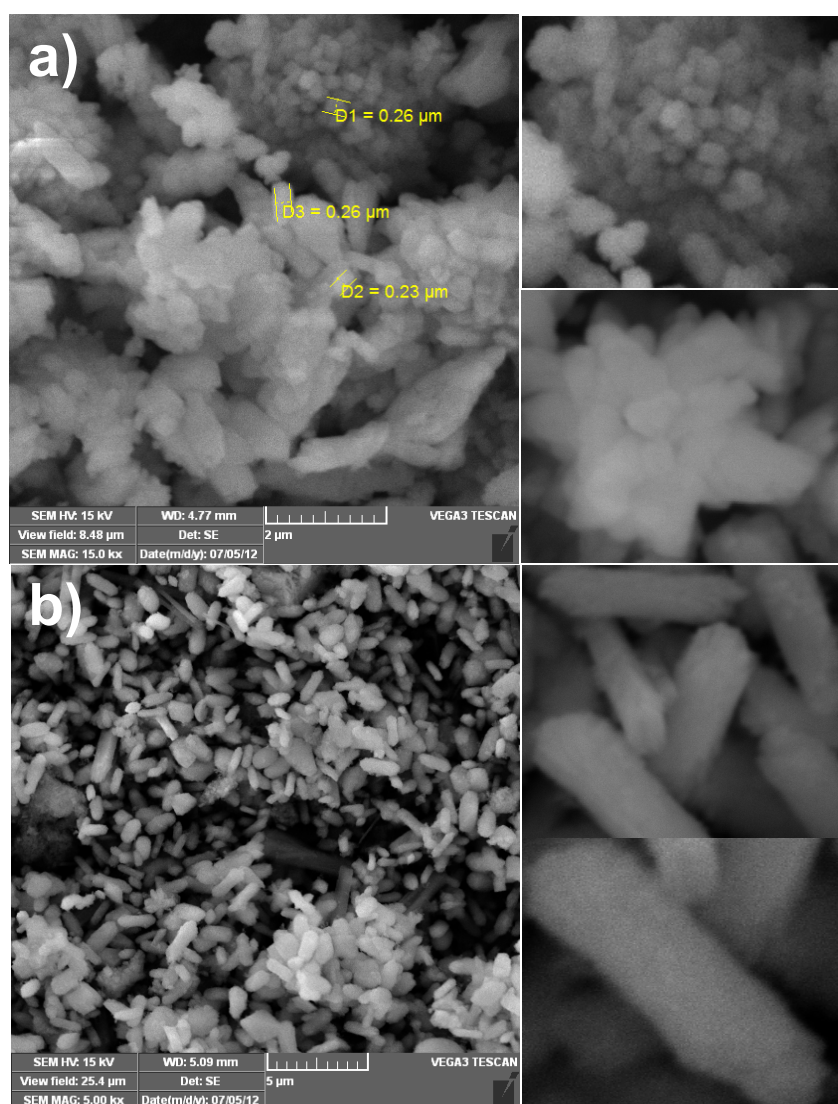

Figure S2 (a) SEM images of  $\text{LiFePO}_4/\text{C}$  obtained by an in-situ addition of Glucose and magnified micro-sphere bunch of  $2\mu\text{m}$  composed of  $150\text{-}200\text{ nm}$   $\text{LiFePO}_4$ , (b) SEM images of the  $\text{LiFePO}_4/\text{C}$  obtained by an in-situ PAA assisted  $\text{LiFePO}_4$  rod and magnified micro rod composed of  $\text{LiFePO}_4$  nano particle.

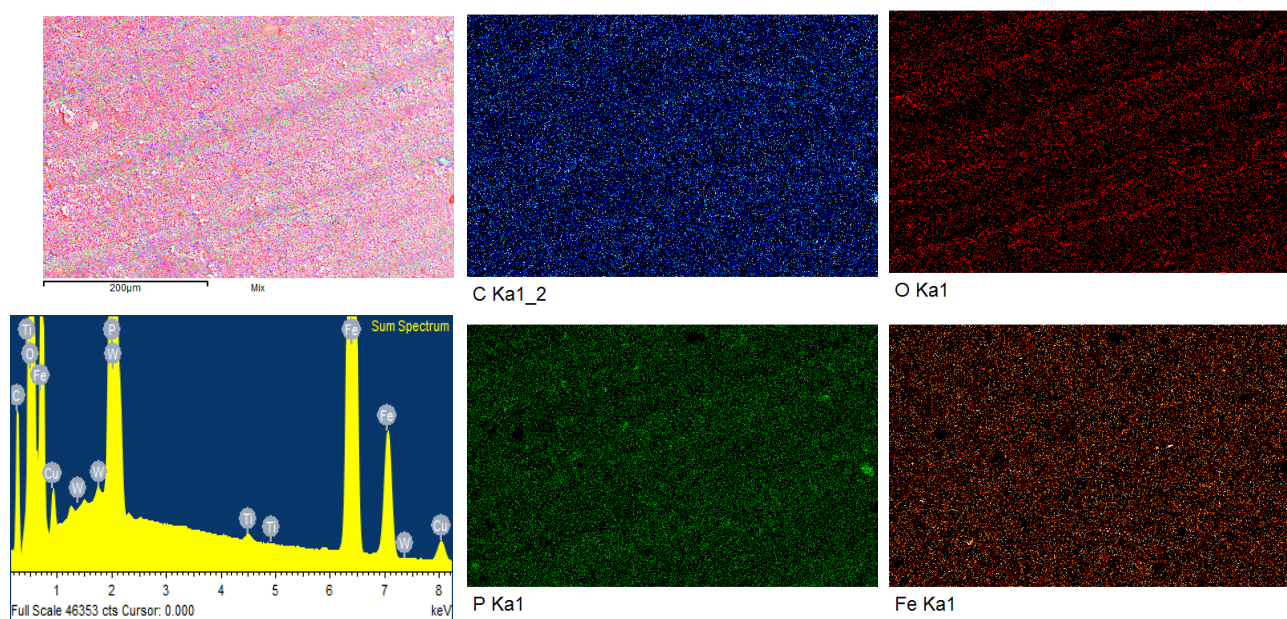

Fig. 3 FE SEM elemental mapping of  $\text{LiFePO}_4/\text{C}$  (LFP-PAA) composite
